# Supplementary material
Source: PubMed Central journal article supplement (PMC3274634)
Supplement: NIHMS341991-supplement-1.pdf [file NIHMS341991-supplement-1.pdf]

## Supplementary figure 1

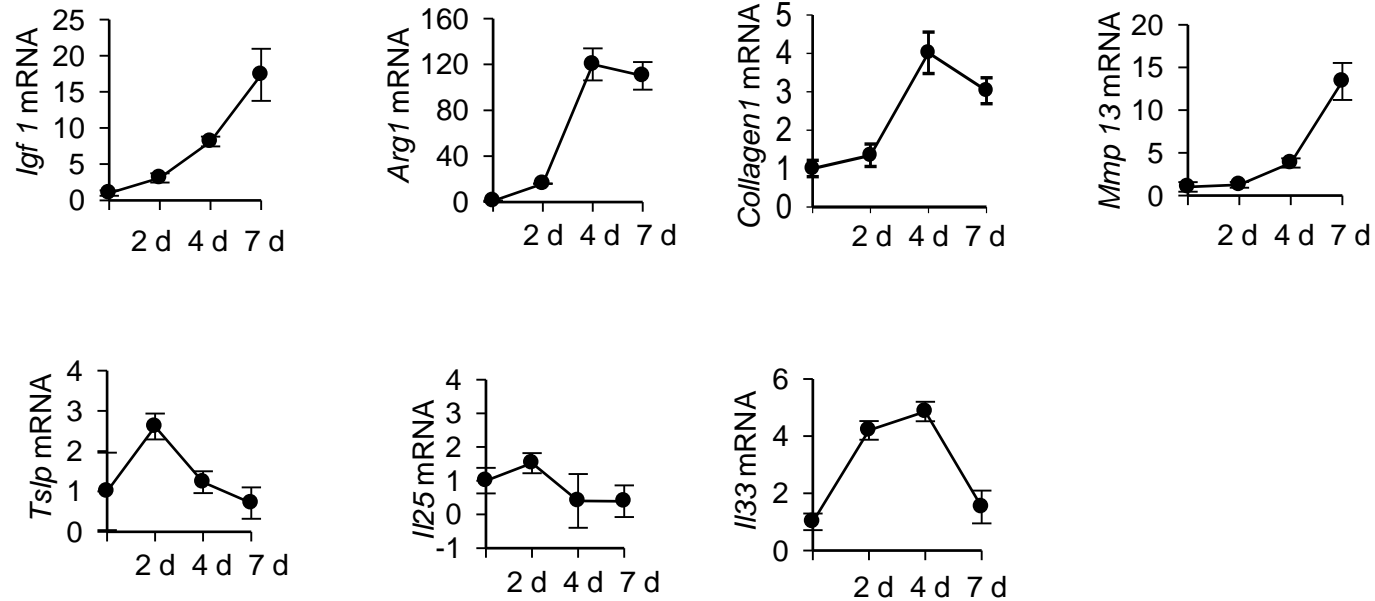

**Figure 1s. Kinetics of wound healing factors and early Th2-type response cytokines after inoculation with *N. brasiliensis*.** Gene expression of insulin-like growth factor (*Igf1*), *Arg1*, *Collagen1*, matrix metalloproteinase 13 (*Mmp13*), *Tslp*, *Il25*, and *Il33* was determined by RT-PCR. Gene expression is expressed as fold increase over naïve WT controls after normalization to 18sRNA. Data shown are the mean and SEM from five individual mice per group and are representative of two independent experiments.
