# Supplementary material
Source: PubMed Central journal article supplement (PMC3274634)
Supplement: NIHMS341991-supplement-2.pdf [file NIHMS341991-supplement-2.pdf]

## Supplementary figure 2

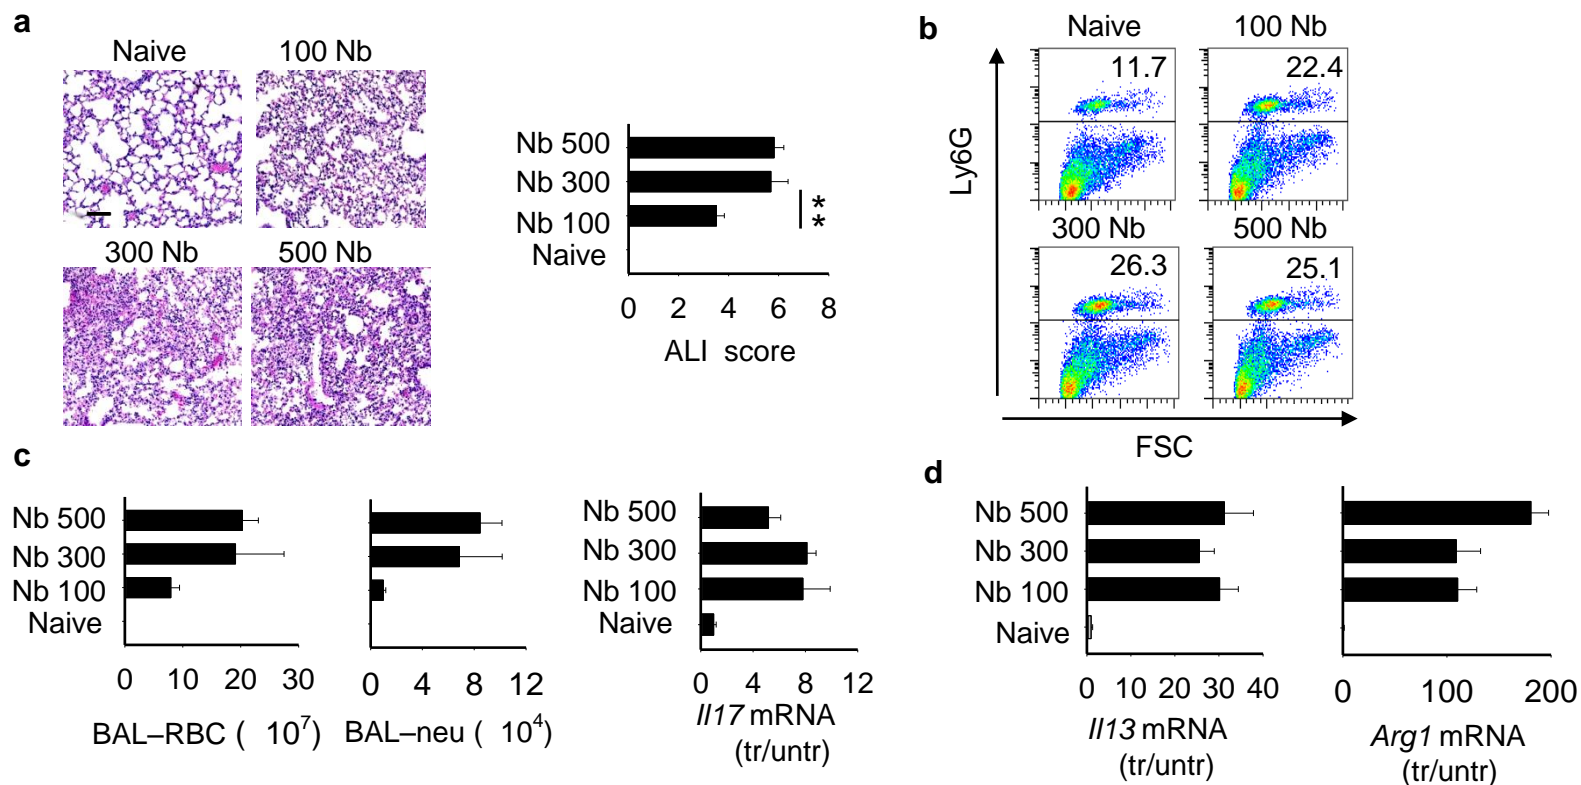

**Figure 2s. Effects of *N. brasiliensis* dose on lung damage and cytokine gene expression.** Mice were inoculated with 100, 300, and 500 *N. brasiliensis* (Nb) L3. At day 2 after inoculation, lungs were collected, examined histologically (Scale bar, 50 $\mu$ m) and scored for ALI (**a**) and neutrophils (LY6G<sup>+</sup>) were assessed by FACS analysis (**b**). BAL RBCs and BAL neutrophils were counted and lung *//17* mRNA expression determined by RT-PCR (**c**). At day 4 after inoculation, lung *//13* and *Arg1* mRNA were assessed by RT-PCR (**d**). All data shown are the mean and SEM from five individual mice per group and are representative of two independent experiments.
