# Supplementary material
Source: PubMed Central journal article supplement (PMC3274634)
Supplement: NIHMS341991-supplement-3.pdf [file NIHMS341991-supplement-3.pdf]

### Supplementary figure 3

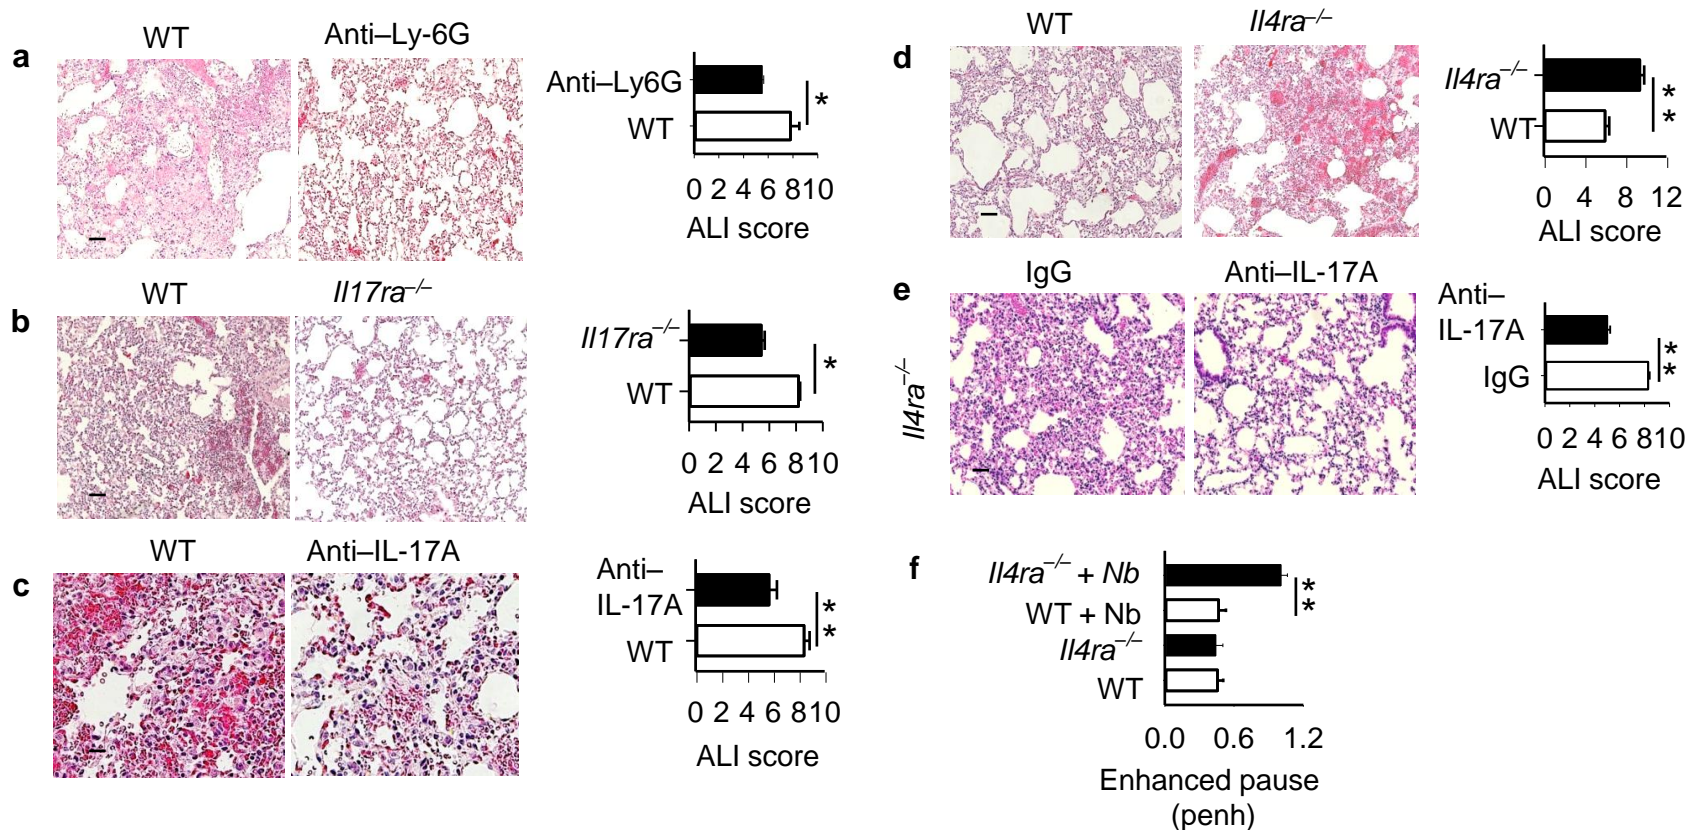

**Figure 3s. Assessment of lung damage and impaired lung function in *N. brasiliensis* (*Nb*)-inoculated mice.** (a–e) Images of representative H&E stained tissue sections and acute lung injury (ALI) score of lung tissue from *Nb*-inoculated KO mice or inoculated WT mice treated with depleting or blocking Abs at day 2 (a–c) or day 4 (d, e) after *Nb* inoculation (Scale bar, 50µm). (f) airway hyperresponsiveness (baseline measurement) indicated as penh (pause enhanced) values at day 4. In all experiments, histological (H&E) preparations are representative of sections from five animals/treatment groups while means and SEM are of five mice/group. Experiments shown were repeated two times with similar results.
