# Supplementary material
Source: PubMed Central journal article supplement (PMC3274634)
Supplement: NIHMS341991-supplement-4.pdf [file NIHMS341991-supplement-4.pdf]

## Supplementary figure 4

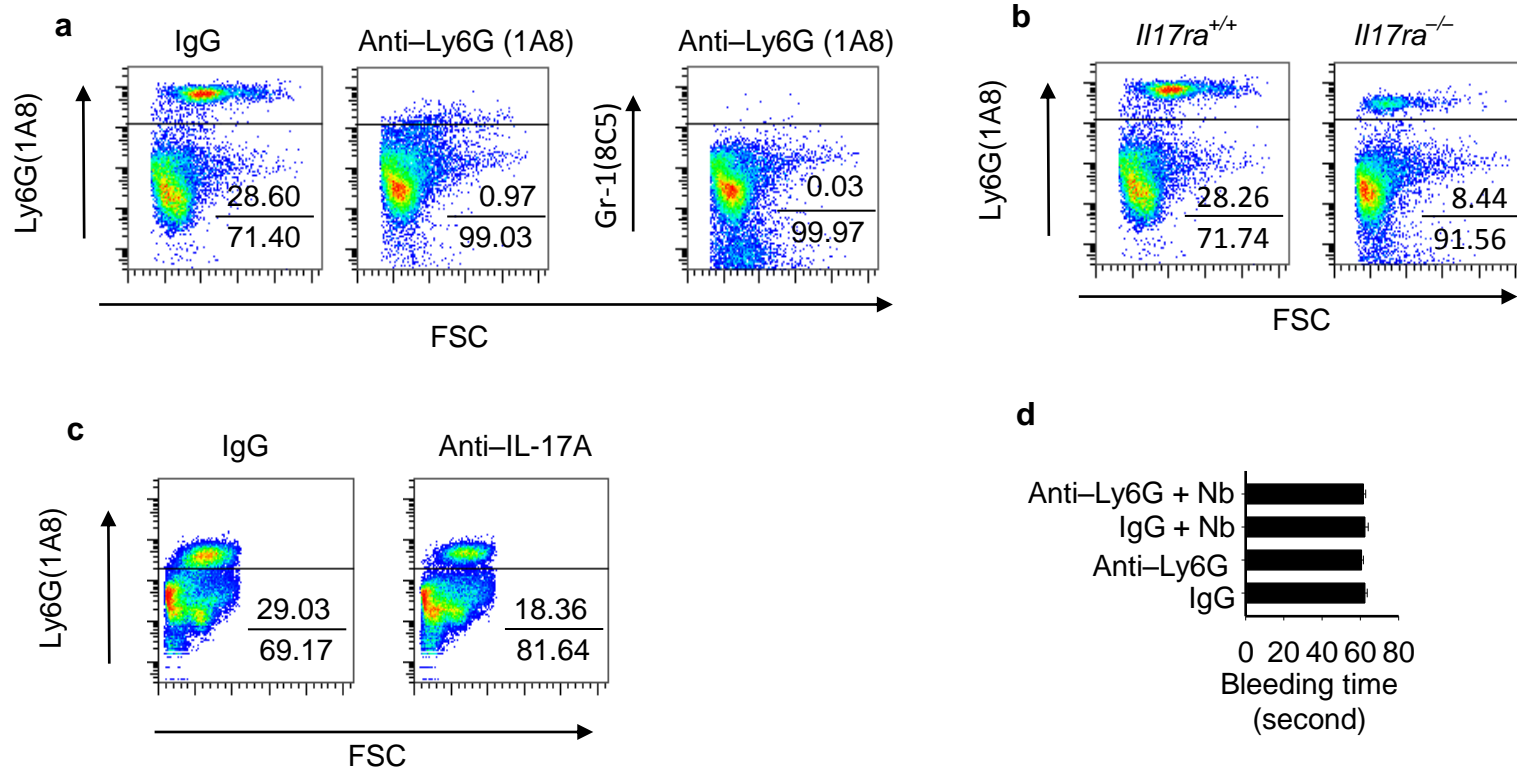

**Figure 4s. Neutrophils in lung are depleted in *N. brasiliensis*-inoculated mice administered Ly6G-specific antibody, reduced in *Il17ra*<sup>-/-</sup> mice or WT mice administered IL-17A-specific Ab and neutrophil depletion does not affect blood coagulation.** (a–c): Lung cells from WT mice administered Ly6G-specific antibody and isotype control (a), or lung cells from *Il17ra*<sup>-/-</sup> and WT controls (b), and WT mice administered IL-17A-specific Ab (c), were isolated at day 2 after inoculation with *N. brasiliensis*, stained with Ly6G-specific Ab, or Gr-1-specific antibody, and analyzed by flow cytometry. FACS analyses are of pooled lung cells from five individual mice per group and are representative of two independent experiments. (d) mice were treated as in a, and blood coagulation was assessed. All data are expressed as the mean and SEM of five animals/treatment group and similar results were obtained in two independent experiments.
