# Supplementary material
Source: PubMed Central journal article supplement (PMC3274634)
Supplement: NIHMS341991-supplement-6.pdf [file NIHMS341991-supplement-6.pdf]

## Supplementary figure 6

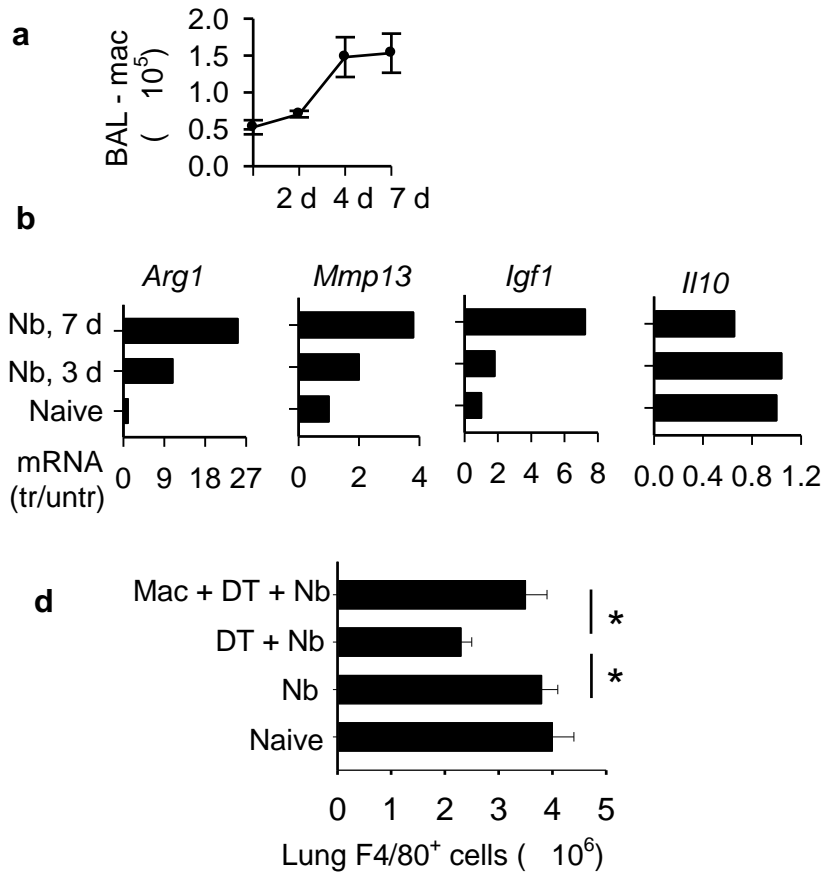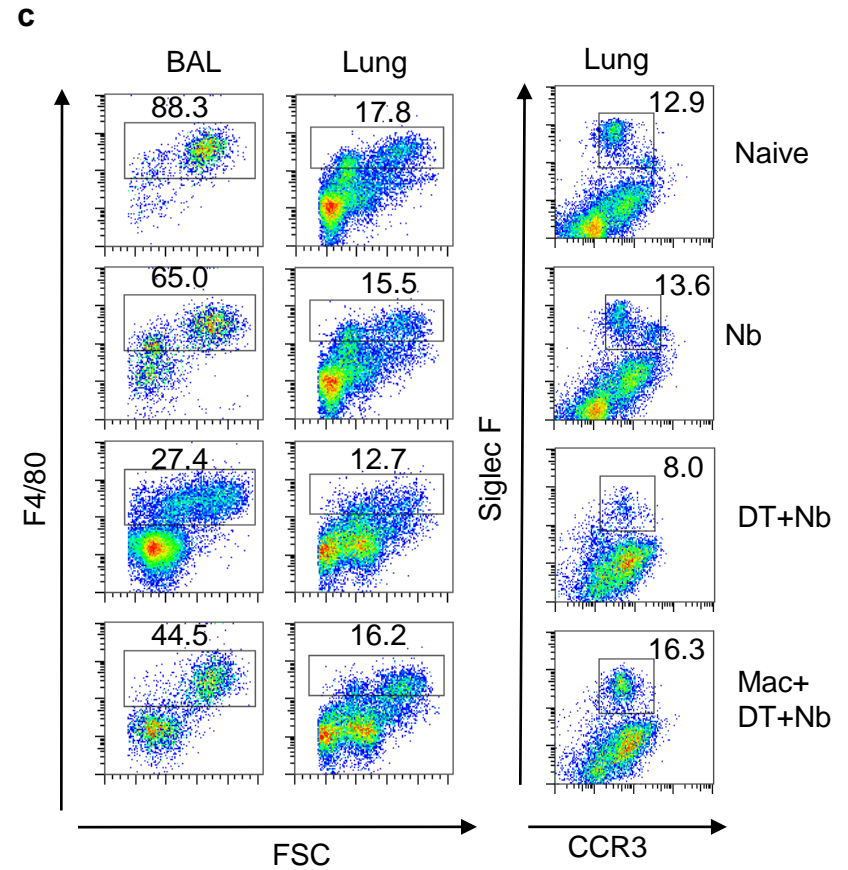

**Figure 6S: Macrophages show increased expression of wound healing factors and flow cytometric analyses of lung tissue and BAL macrophages from DT-treated CD11b-DTR mice.** (a) BAL was collected at days 0, 2, 4, and 7 after inoculation with *N. brasiliensis* (Nb) and macrophage (F4/80<sup>+</sup>) number determined by flow cytometric analyses. (b) F4/80<sup>+</sup> macrophages were sorted at day 0, 3, and 7 after Nb-inoculation and assessed for *Il10*, *Arg.1*, *Mmp13*, and *Igf1* mRNA using RT-PCR. (c) CD11bDTR mice were inoculated with *N. brasiliensis* (Nb) and administered DT to deplete macrophages *in vivo*. WT lung-derived macrophages were transferred to DT treated CD11bDTR mice prior to inoculation. On day 3 after inoculation, BAL and lung tissue single cell suspensions were stained for macrophages (F4/80<sup>+</sup>) and eosinophils (siglecF<sup>+</sup> and CCR3<sup>+</sup>) and analyzed by flow cytometry. Data are from pooled samples from five mice/treatment group and similar results were obtained in two independent experiments. (d) Total lung cells were counted and lung F4/80<sup>+</sup> macrophages were calculated from percentage of total. Results are reported from three to five individual mice per group and similar results were obtained in two independent experiments.
