# Supplementary material
Source: PubMed Central journal article supplement (PMC3274634)
Supplement: NIHMS341991-supplement-7.pdf [file NIHMS341991-supplement-7.pdf]

## Supplementary figure 7

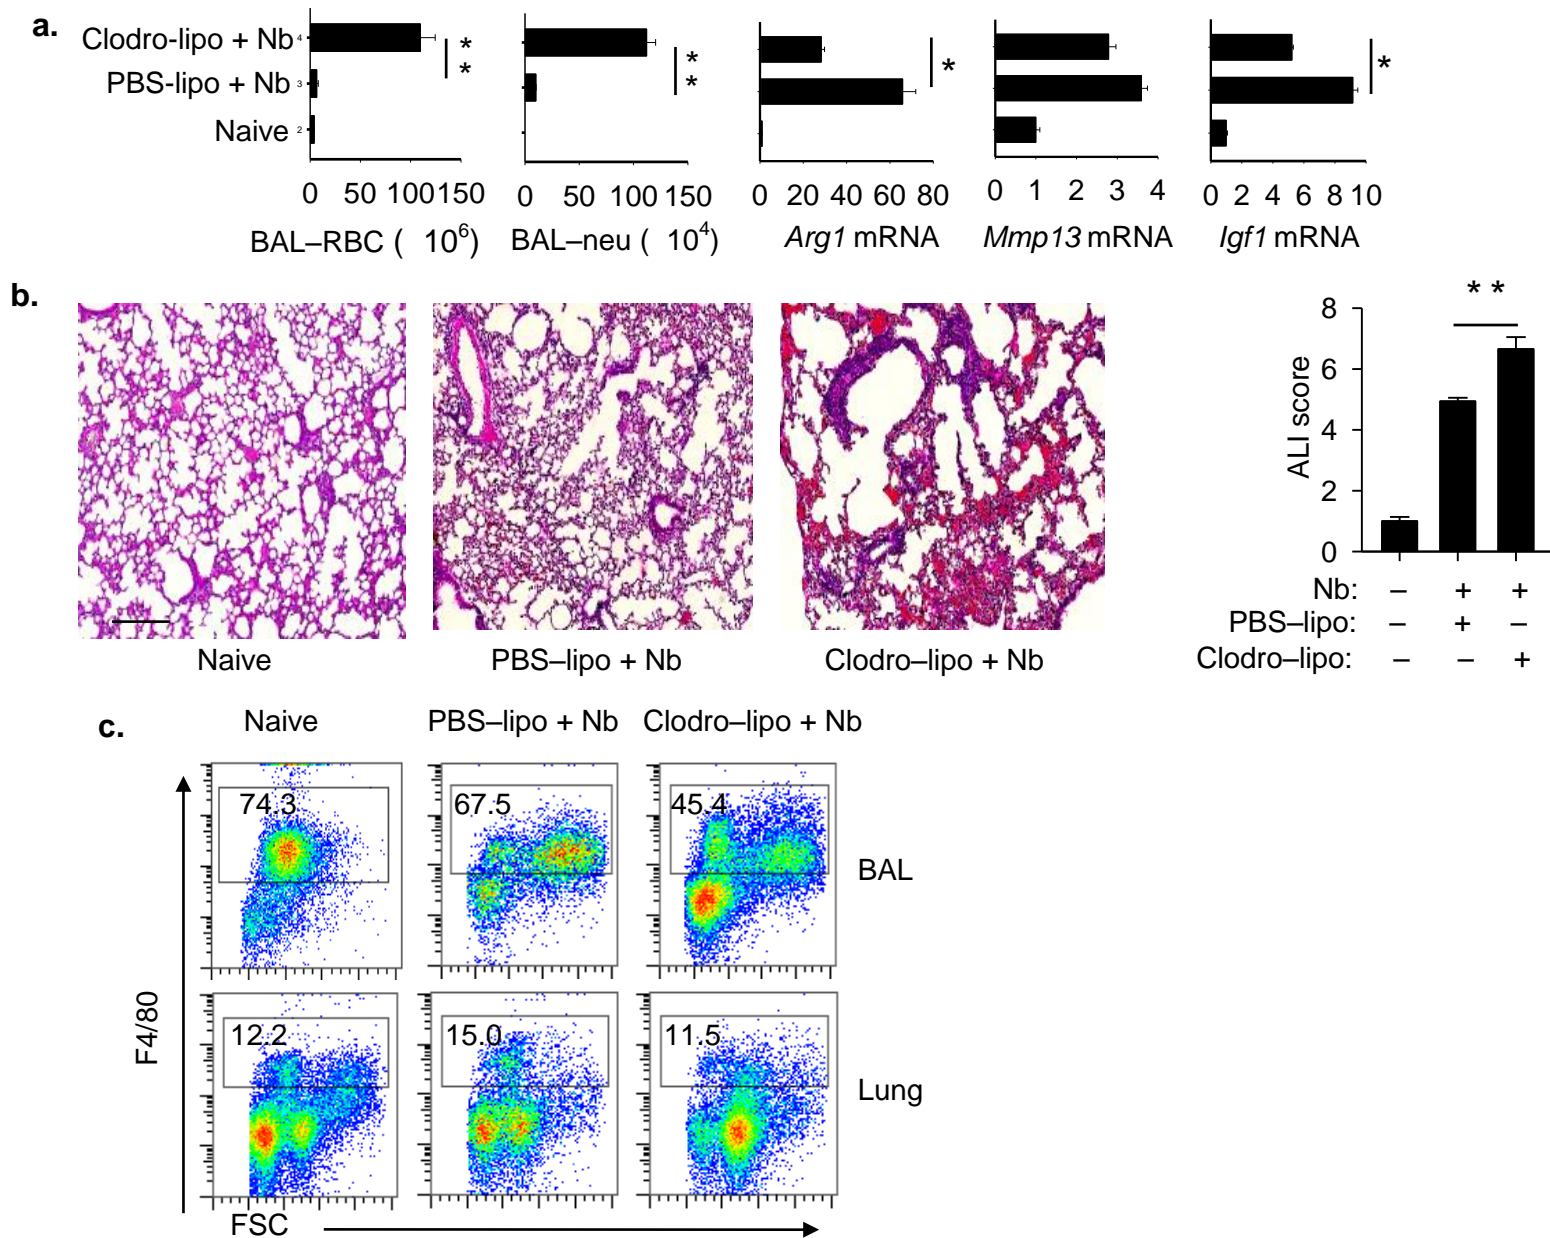

**Figure 7S: Lung damage as assessed by Clodronate-liposome depletion of macrophages.** (a) Mice were treated with Clodronate-liposomes (Clodro-lipo) or PBS-liposomes (PBS-lipo) and inoculated with *N. brasiliensis* (Nb). At day 4, BAL RBCs and BAL neutrophils were counted and lung *Arg1*, *Igf1*, and *Mmp13* mRNA expression determined by RT-PCR. (b) Stained lung tissue sections are representative examples of results from five mice/group (Scale bar, 50  $\mu$ m) and ALI scores are expressed as the mean and SEM of five mice/group. (c) Flow cytometric analyses of F4/80<sup>+</sup> macrophages in Nb-inoculated mice administered PBS-liposomes or clodronate-liposomes. Similar results were obtained in three independent experiments.
